# Supplementary material
Source: Springer Nature journal article supplement (https://www.springermedizin.de/resource/supplementary/13063_2009_359_MOESM3_ESM.pdf/9618060)
Supplement: MOESM3 [file 9618060]

**Assessed for eligibility** (16 areas)

**Excluded** (n=0)

**Randomised** (16 areas)

**Allocated to intervention** (8 areas)

**Received allocated intervention**

(n) participants treated by outreach worker

(n) participants treated by local stop smoking service provider

**Allocated to control** (8 areas)

**Received allocated control**

(n) participants treated by local stop smoking service provider

**Lost to follow-up:**

(n) participants lost to follow-up at 4-weeks

(n) participants lost to follow-up at 3-months

(n) participants lost to follow-up at 6-months

**Lost to follow-up:**

(n) participants lost to follow-up at 4-weeks

(n) participants lost to follow-up at 3-months

(n) participants lost to follow-up at 6-months

**Analysed:**

(n) participants analysed

(n) excluded from analysis

**Analysed:**

(n) participants analysed

(n) excluded from analysis
